# Supplementary material for: Modeling the onset of symptoms of COVID-19: Effects of SARS-CoV-2 variant
Source: PLoS Comput Biol. 2021 Dec 16;17(12):e1009629. doi: 10.1371/journal.pcbi.1009629 (PMC8675677; doi:10.1371/journal.pcbi.1009629)
Supplement: S1 Table — These frequencies were used to simulate patients to find the likeliest paths of symptom onset for discernible symptoms of COVID-19. The dataset from China contains 55,924 patients, and the dataset from USA contains 373,883 patients. (XLSX) [file pcbi.1009629.s001.xlsx]

## Sheet: Sheet1
	No. (%) of patient
	China	USA
Fever	49,157 (87.9)	161, 071 (43.1)
Cough	37,861 (67.7)	187,953 (50.3)
Nausea/Vomiting	2,796 (5.0)	42,813 (11.5)
Diarrhea	2,069 (3.7)	72,039 (19.3)
